# Supplementary material for: Morphological and Structural Studies of Titanate and Titania Nanostructured Materials Obtained after Heat Treatments of Hydrothermally Produced Layered Titanate
Source: Hindawi journal article supplement (doi:10.1155/2012/962073), 2012-01-01
Supplement: f1 [file 962073.f1.docx]

Supplementary information documents contain the FESEM & TEM micrograph and EDX of TiO2 precursors (Figure S1-S3). In addition, the EDX of Na2Ti3O7 and EDX of as-synthesized sample A & B respectively (Figure S4-S6).


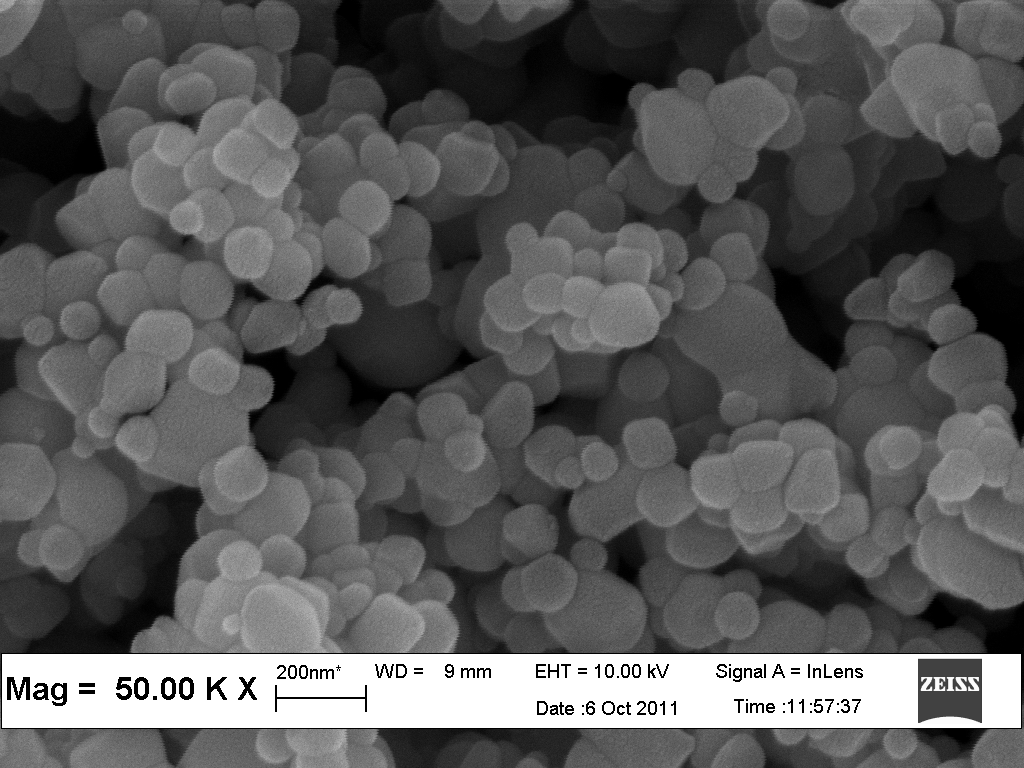


FIGURE S1: FESEM micrograph of TiO2 precursor


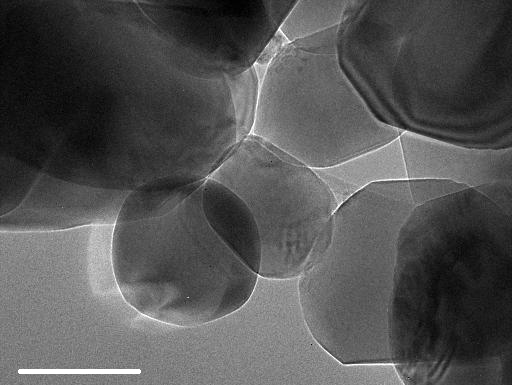


**100 nm**

FIGURE S2: TEM micrograph of TiO2 precursor


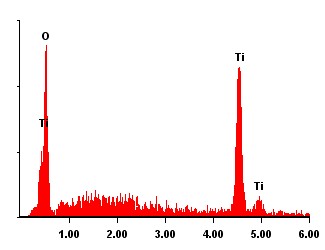


**Intensity (%)**

**Energy (keV)**

FIGURE S3: EDX of TiO2 precursor


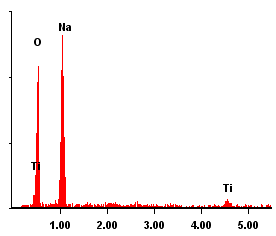


**Intensity (%)**

**Energy (keV)**

**Intensity (%)**

FIGURE S4: EDX of Na2Ti3O7


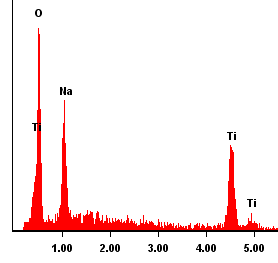


**Intensity (%)**

**Intensity (%)**

**Intensity (%)**

**Energy (keV)**

FIGURE S5: EDX of as-synthesised sample A


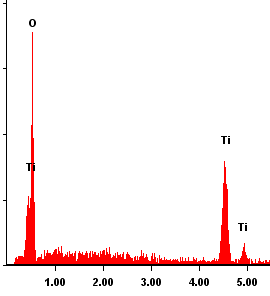


**Intensity (%)**

**Energy (keV)**

FIGURE S6: EDX of as-synthesised sample B
